# Supplementary material for: Quasi-experimental analysis of new mining developments as a driver of deforestation in Zambia
Source: PubMed Central journal article supplement (PMC9617878; doi:10.1038/s41598-022-22762-4), 2022-10-29
Supplement: 41598_2022_22762_MOESM1_ESM.pdf [file 41598_2022_22762_MOESM1_ESM.pdf]

# Quasi-experimental analysis of new mining developments as a driver of deforestation in Zambia

Jonathan Morley\*<sup>1</sup>, Graeme Buchanan<sup>2</sup>, Edward T.A. Mitchard<sup>1</sup>, Aidan Keane<sup>1</sup>

<sup>1</sup> School of GeoSciences, University of Edinburgh, Edinburgh, UK

<sup>2</sup> RSPB Centre for Conservation Science, RSPB Scotland, Edinburgh, UK

## Corresponding author:

Jonathan Morley, [jonathan.morley@ed.ac.uk](mailto:jonathan.morley@ed.ac.uk), Room 401, Crew Building, West Mains Road, Edinburgh, EH9 3FF

## Supplementary Material

**Table S1:** Details of mining leases taken from the Zambian government portal (<https://portals.landfolio.com/zambia/> accessed February 2020) and the active from date they were assigned. Adjacent leases that are part of the same operation were merged. Only leases that began operations after 2000 were analysed as part of this study. Never active leases were ignored and those active before 2000 had 25 km radius buffers applied and were excluded as possible controls.

| Mine            | Lease code(s)                                                                                                                                                                                                                                                                                                                                                                                                                                                                                                                                                                                                                                                                                                                                                                                                                                                                | Date Granted | Active from |
|-----------------|------------------------------------------------------------------------------------------------------------------------------------------------------------------------------------------------------------------------------------------------------------------------------------------------------------------------------------------------------------------------------------------------------------------------------------------------------------------------------------------------------------------------------------------------------------------------------------------------------------------------------------------------------------------------------------------------------------------------------------------------------------------------------------------------------------------------------------------------------------------------------|--------------|-------------|
| m01             | Merged - 8089-HQ-LML, 9000-HQ-LML, 9001-HQ-LML, 9002-HQ-LML, 9003-HQ-LML, 9004-HQ-LML                                                                                                                                                                                                                                                                                                                                                                                                                                                                                                                                                                                                                                                                                                                                                                                        | 06/01/2004   | 2004        |
| m02             | 8353-HQ-LML                                                                                                                                                                                                                                                                                                                                                                                                                                                                                                                                                                                                                                                                                                                                                                                                                                                                  | 15/05/2006   | 2006        |
| m03             | 22446-HQ-LML                                                                                                                                                                                                                                                                                                                                                                                                                                                                                                                                                                                                                                                                                                                                                                                                                                                                 | 13/03/2018   | 2008        |
| m04             | 19456-HQ-LML                                                                                                                                                                                                                                                                                                                                                                                                                                                                                                                                                                                                                                                                                                                                                                                                                                                                 | 06/03/2014   | 2008        |
| m05             | 19001-HQ-LML                                                                                                                                                                                                                                                                                                                                                                                                                                                                                                                                                                                                                                                                                                                                                                                                                                                                 | 16/01/2014   | 2008        |
| m06             | 16032-HQ-LML                                                                                                                                                                                                                                                                                                                                                                                                                                                                                                                                                                                                                                                                                                                                                                                                                                                                 | 04/10/2011   | 2011        |
| m07             | Merged - 15868-HQ-LML, 15869-HQ-LML, 15870-HQ-LML, 15871-HQ-LML, 15872-HQ-LML                                                                                                                                                                                                                                                                                                                                                                                                                                                                                                                                                                                                                                                                                                                                                                                                | 20/04/2011   | 2011        |
| m08             | Merged - 19159-HQ-LML, 22025-HQ-LML                                                                                                                                                                                                                                                                                                                                                                                                                                                                                                                                                                                                                                                                                                                                                                                                                                          | 29/08/2013   | 2012        |
| m09             | 16773-HQ-LML                                                                                                                                                                                                                                                                                                                                                                                                                                                                                                                                                                                                                                                                                                                                                                                                                                                                 | 03/08/2012   | 2012        |
| m10             | 20147-HQ-LML                                                                                                                                                                                                                                                                                                                                                                                                                                                                                                                                                                                                                                                                                                                                                                                                                                                                 | 20/05/2015   | 2013        |
| m11             | 18153-HQ-LML                                                                                                                                                                                                                                                                                                                                                                                                                                                                                                                                                                                                                                                                                                                                                                                                                                                                 | 04/02/2013   | 2013        |
| m12             | 18703-HQ-LML                                                                                                                                                                                                                                                                                                                                                                                                                                                                                                                                                                                                                                                                                                                                                                                                                                                                 | 11/08/2014   | 2014        |
| m13             | 19437-HQ-LML                                                                                                                                                                                                                                                                                                                                                                                                                                                                                                                                                                                                                                                                                                                                                                                                                                                                 | 09/05/2014   | 2014        |
| m14             | 20000-HQ-LML                                                                                                                                                                                                                                                                                                                                                                                                                                                                                                                                                                                                                                                                                                                                                                                                                                                                 | 16/10/2014   | 2014        |
| m15             | 20306-HQ-LML                                                                                                                                                                                                                                                                                                                                                                                                                                                                                                                                                                                                                                                                                                                                                                                                                                                                 | 09/04/2015   | 2014        |
| m16             | 20539-HQ-LML                                                                                                                                                                                                                                                                                                                                                                                                                                                                                                                                                                                                                                                                                                                                                                                                                                                                 | 09/07/2015   | 2014        |
| m17             | 19725-HQ-LML                                                                                                                                                                                                                                                                                                                                                                                                                                                                                                                                                                                                                                                                                                                                                                                                                                                                 | 28/08/2014   | 2014        |
| m18             | 20059-HQ-LML                                                                                                                                                                                                                                                                                                                                                                                                                                                                                                                                                                                                                                                                                                                                                                                                                                                                 | 23/06/2015   | 2014        |
| m19             | 15071-HQ-LML                                                                                                                                                                                                                                                                                                                                                                                                                                                                                                                                                                                                                                                                                                                                                                                                                                                                 | 27/09/2012   | 2015        |
| m20             | 20386-HQ-LML                                                                                                                                                                                                                                                                                                                                                                                                                                                                                                                                                                                                                                                                                                                                                                                                                                                                 | 22/04/2015   | 2015        |
| m21             | 20501-HQ-LML                                                                                                                                                                                                                                                                                                                                                                                                                                                                                                                                                                                                                                                                                                                                                                                                                                                                 | 17/08/2015   | 2015        |
| m22             | 8354-HQ-LML                                                                                                                                                                                                                                                                                                                                                                                                                                                                                                                                                                                                                                                                                                                                                                                                                                                                  | 22/05/2006   | 2017        |
| never active    | 19619-HQ-LML, 20405-HQ-LML, 19255-HQ-LML, 23989-HQ-LML, 19206-HQ-LML, 19565-HQ-LML, 13837-HQ-LML, 8753-HQ-LML, 23751-HQ-LML, 12617-HQ-LML, 22447-HQ-LML                                                                                                                                                                                                                                                                                                                                                                                                                                                                                                                                                                                                                                                                                                                      |              |             |
| active pre-2000 | 14948-HQ-LML, 7075-HQ-LML, 14532-HQ-LML, 8628-HQ-LML, 19624-HQ-LML, 17878-HQ-LML, 7064-HQ-LML, 8611-HQ-LML, 19820-HQ-LML, 7625-HQ-LML, 7065-HQ-LML, 24498-HQ-LML, 17611-HQ-LML, 7058-HQ-LML, 7057-HQ-LML, 20813-HQ-SML, 20282-HQ-LML, 12848-HQ-LML, 25089-HQ-LML, 14182-HQ-LML, 7069-HQ-LML, 17526-HQ-LEL, 8752-HQ-LML, 8750-HQ-LML, 12634-HQ-LML, 20584-HQ-LML, 8625-HQ-LML, 7071-HQ-LML, 8245-HQ-LML, 17868-HQ-LML, 17894-HQ-LML, 7045-HQ-LML, 13207-HQ-LML, 13287-HQ-LML, 7061-HQ-LML, 20809-HQ-LML, 15547-HQ-LML, 6990-HQ-LML, 21816-HQ-LML, 8097-HQ-LML, 7076-HQ-LML, 7074-HQ-LML, 7073-HQ-LML, 8622-HQ-LML, 12985-HQ-LML, 13881-HQ-LML, 8509-HQ-LML, 8323-HQ-LML, 8325-HQ-LML, 8749-HQ-LML, 8392-HQ-LML, 19740-HQ-LML, 8748-HQ-LML, 8474-HQ-LML, 8404-HQ-LML, 8403-HQ-LML, 8403-HQ-LML, 8396-HQ-LML, 8395-HQ-LML, 8394-HQ-LML, 8393-HQ-LML, 17164-HQ-LML, 13880-HQ-LML |              |             |

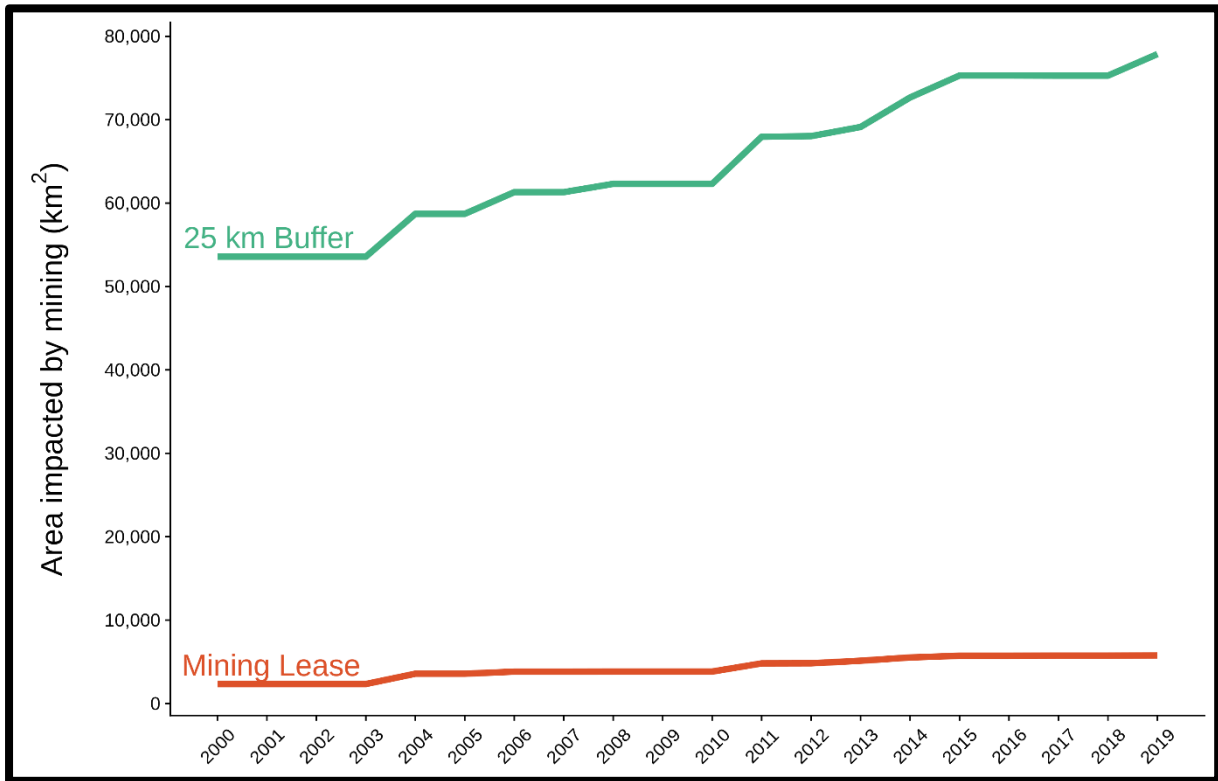

**Figure S1:** Growth in mine impacted area over time from 2000 onwards separated by pixels within mining leases and 25 km radius buffers.

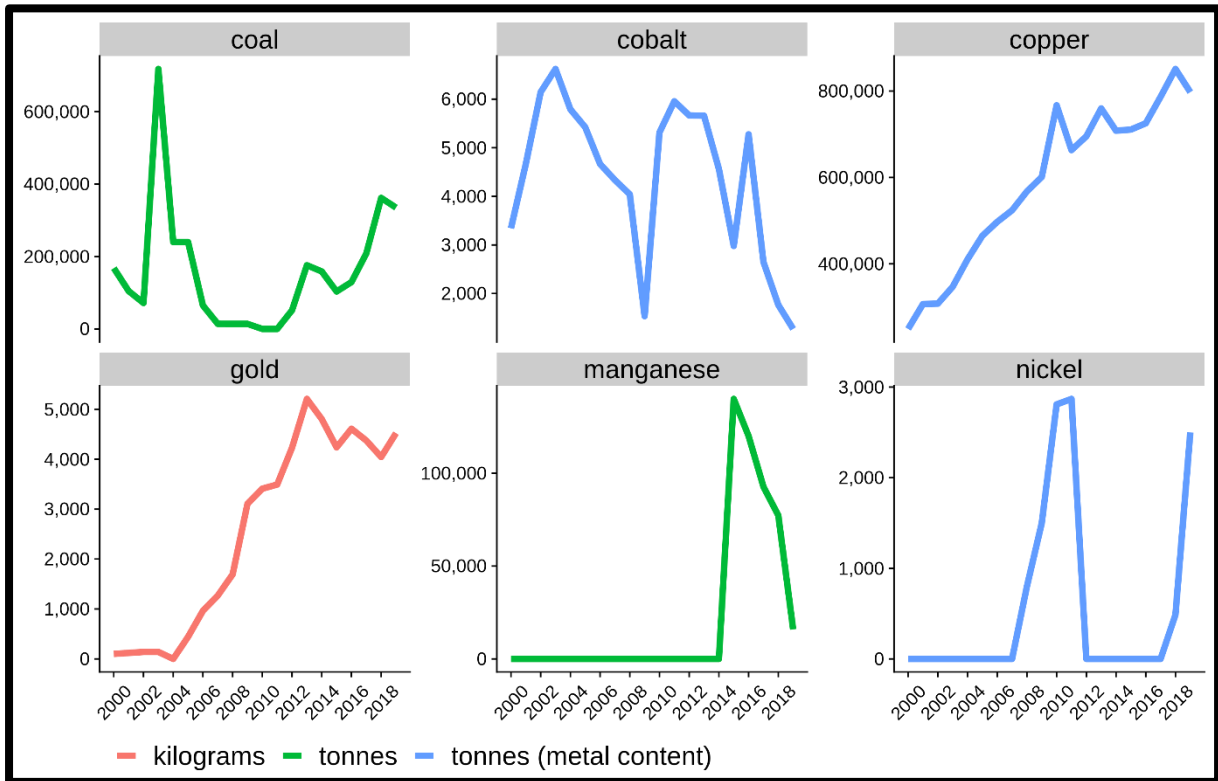

**Figure S2:** Growth in production of selected mined resources 2000 to 2019 in Zambia. Data is taken from (<https://www2.bgs.ac.uk/mineralsuk/>). Minerals shown represent the major resources in Zambia and are extracted in one or more of our study mines (Table S2). The different colours represent different units of measurement. Zambia also produces substantial amounts of emeralds, other gemstones, and limestone. These are absent from the figure as comparable data is not available.

**Table S2:** Commodities that are licenced for extraction at the mining leases of the 22 study mines. Taken from the Zambian government portal (<https://portals.landfolio.com/zambia/> accessed February 2020).

| mine | Commodities                                                                                                                                                                                                              | Extraction method        |
|------|--------------------------------------------------------------------------------------------------------------------------------------------------------------------------------------------------------------------------|--------------------------|
| m01  | Cobalt, Copper, Gold, Silver, Sulfur, Uranium                                                                                                                                                                            | Open pit                 |
| m02  | Bismuth, Chromium, Coal, Cobalt, Copper, Diamond, Gold, Iron Ore, Lead, Manganese, Molybdenum, Nickel, Phosphorus-Phosphates, Selenium, Silver, Sulfur, Tellurium, Thorium, Titanium, Uranium, Vanadium, Zinc, Zirconium | Underground              |
| m03  | Dolomite, Laterite, Limestone (General)                                                                                                                                                                                  | Open pit                 |
| m04  | Dolomite                                                                                                                                                                                                                 | Open pit                 |
| m05  | Limestone (General), Stone                                                                                                                                                                                               | Open pit                 |
| m06  | Crushed/Broken Stone, Dolomite, Limestone (General)                                                                                                                                                                      | Open pit                 |
| m07  | Cobalt, Copper, Gold, Iron Ore, Nickel, Platinum Group Metals, Selenium, Silver                                                                                                                                          | Open pit                 |
| m08  | Limestone (General)                                                                                                                                                                                                      | Open pit                 |
| m09  | Limestone (General)                                                                                                                                                                                                      | Open pit                 |
| m10  | Dolomite, Limestone (General)                                                                                                                                                                                            | Open pit                 |
| m11  | Copper                                                                                                                                                                                                                   | Open pit                 |
| m12  | Limestone (General)                                                                                                                                                                                                      | Open pit                 |
| m13  | Dolomite, Granite, Limestone (General)                                                                                                                                                                                   | Open pit                 |
| m14  | Cobalt, Copper, Gold, Granite, Limestone (General), Manganese                                                                                                                                                            | Unclear                  |
| m15  | Limestone (General)                                                                                                                                                                                                      | Open pit                 |
| m16  | Limestone (General)                                                                                                                                                                                                      | Unclear                  |
| m17  | Limestone (General), Marble                                                                                                                                                                                              | Open pit                 |
| m18  | Dolomite, Granite, Limestone (General)                                                                                                                                                                                   | Open pit                 |
| m19  | Amethyst, Cobalt, Copper, Lead, Manganese, Quartz, Tin, Tourmaline, Zinc                                                                                                                                                 | Unclear                  |
| m20  | Dolomite, Limestone (General)                                                                                                                                                                                            | Open pit                 |
| m21  | Cobalt, Copper, Gold, Iron Ore, Limestone (General), Manganese, Silver, Zinc                                                                                                                                             | Open pit                 |
| m22  | Copper, Gold, Iron Ore, Limestone (General), Manganese, Nickel, Stone                                                                                                                                                    | Mountaintop and open pit |

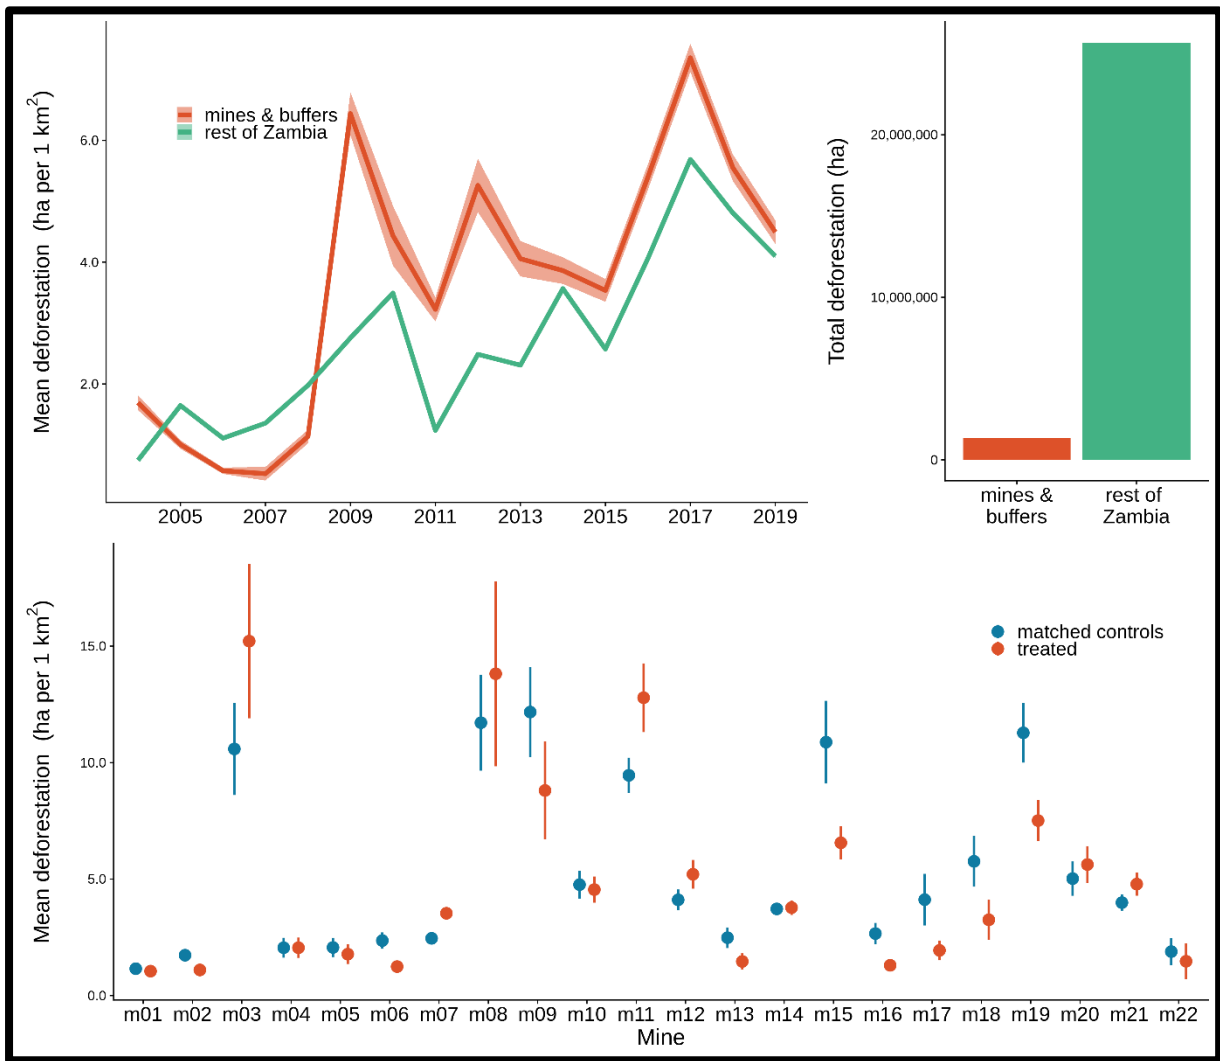

**Figure S3:** This figure is identical to Figure 2 in the main text but using values for deforestation which are unweighted by tree cover to be comparable to other sources (See Methods).

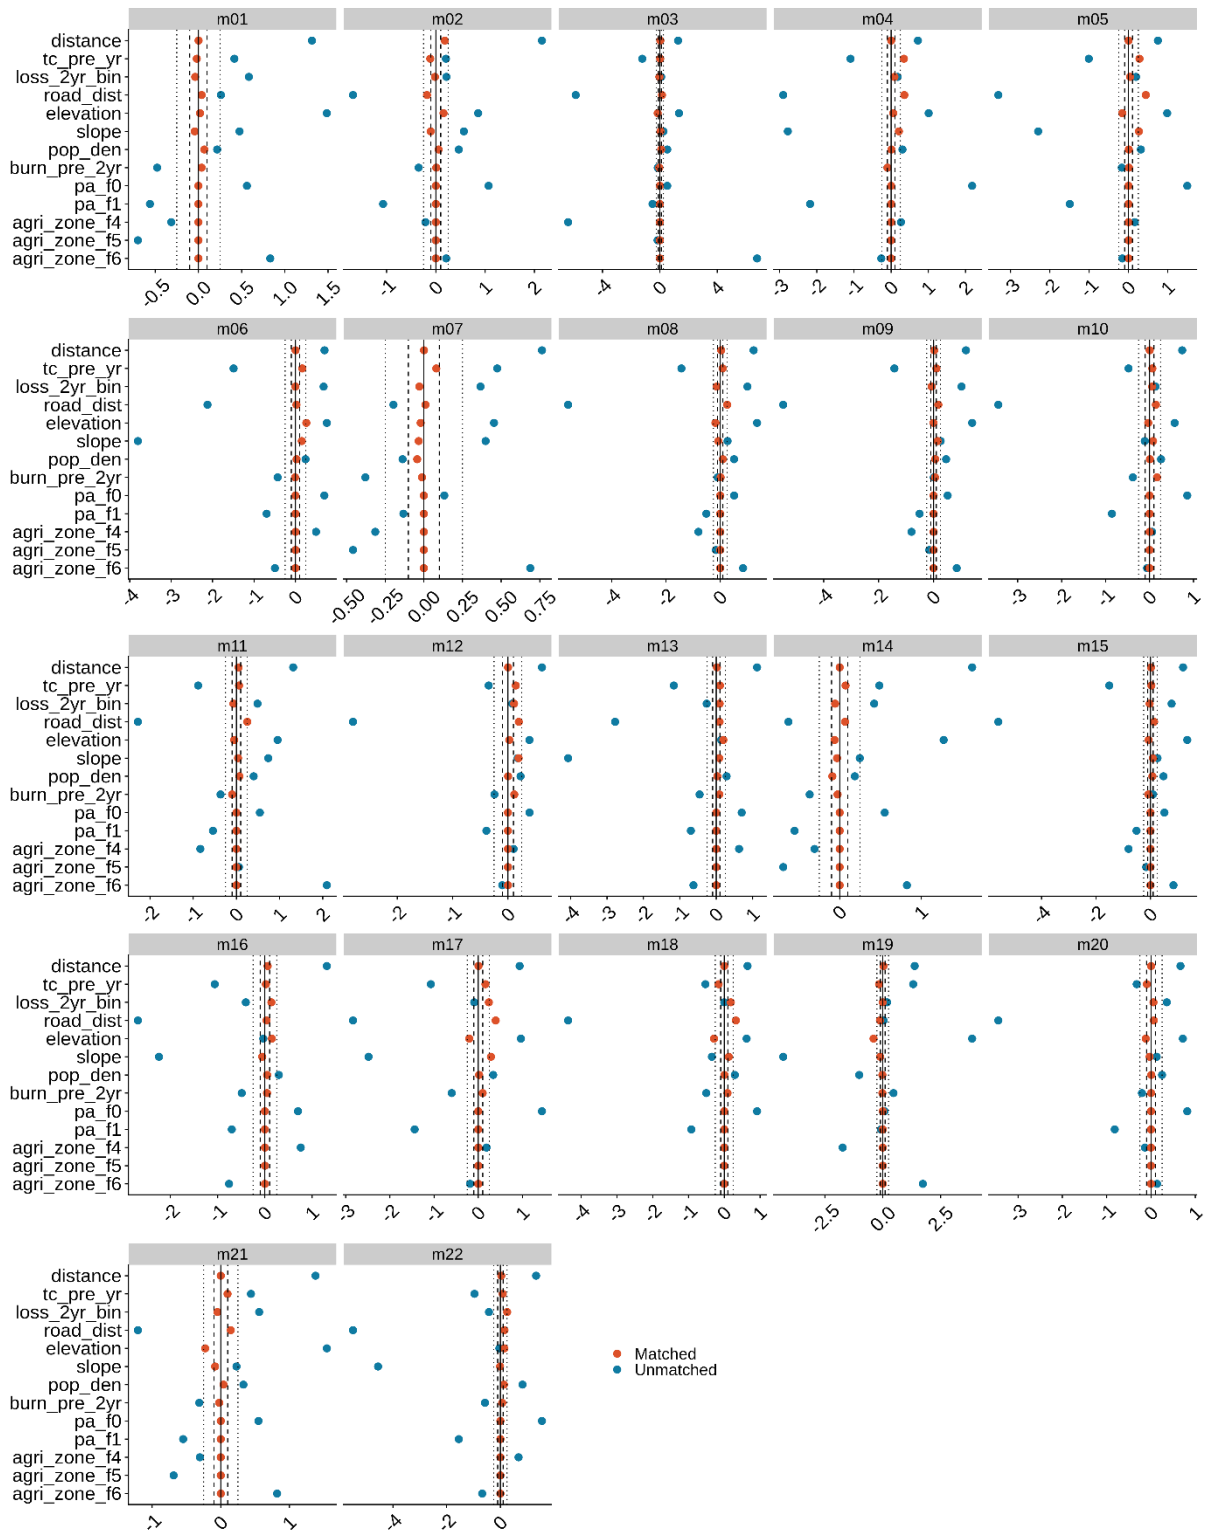

**Figure S4:** Standardized mean difference plot for main dataset comparing difference between treated and control pixels for key covariates in the dataset before matching and after applying propensity score matching. Distance is the Propensity Score, i.e., the probability of being treated. *Tc\_pre\_yr* is the tree cover in year prior to mine being established; *loss\_2yr\_bin* is a binary value of whether there had been any deforestation in the previous two years; *road\_dist* is distance to the nearest road; *pop\_den* is the density of human population; *burn\_pre\_2yr* is number of months with a burning event in the previous two years; *pa\_f* variables indicates whether the pixel is within a protected area, *agri\_zone* variables indicate which agro-ecological zone a pixel is a member of.

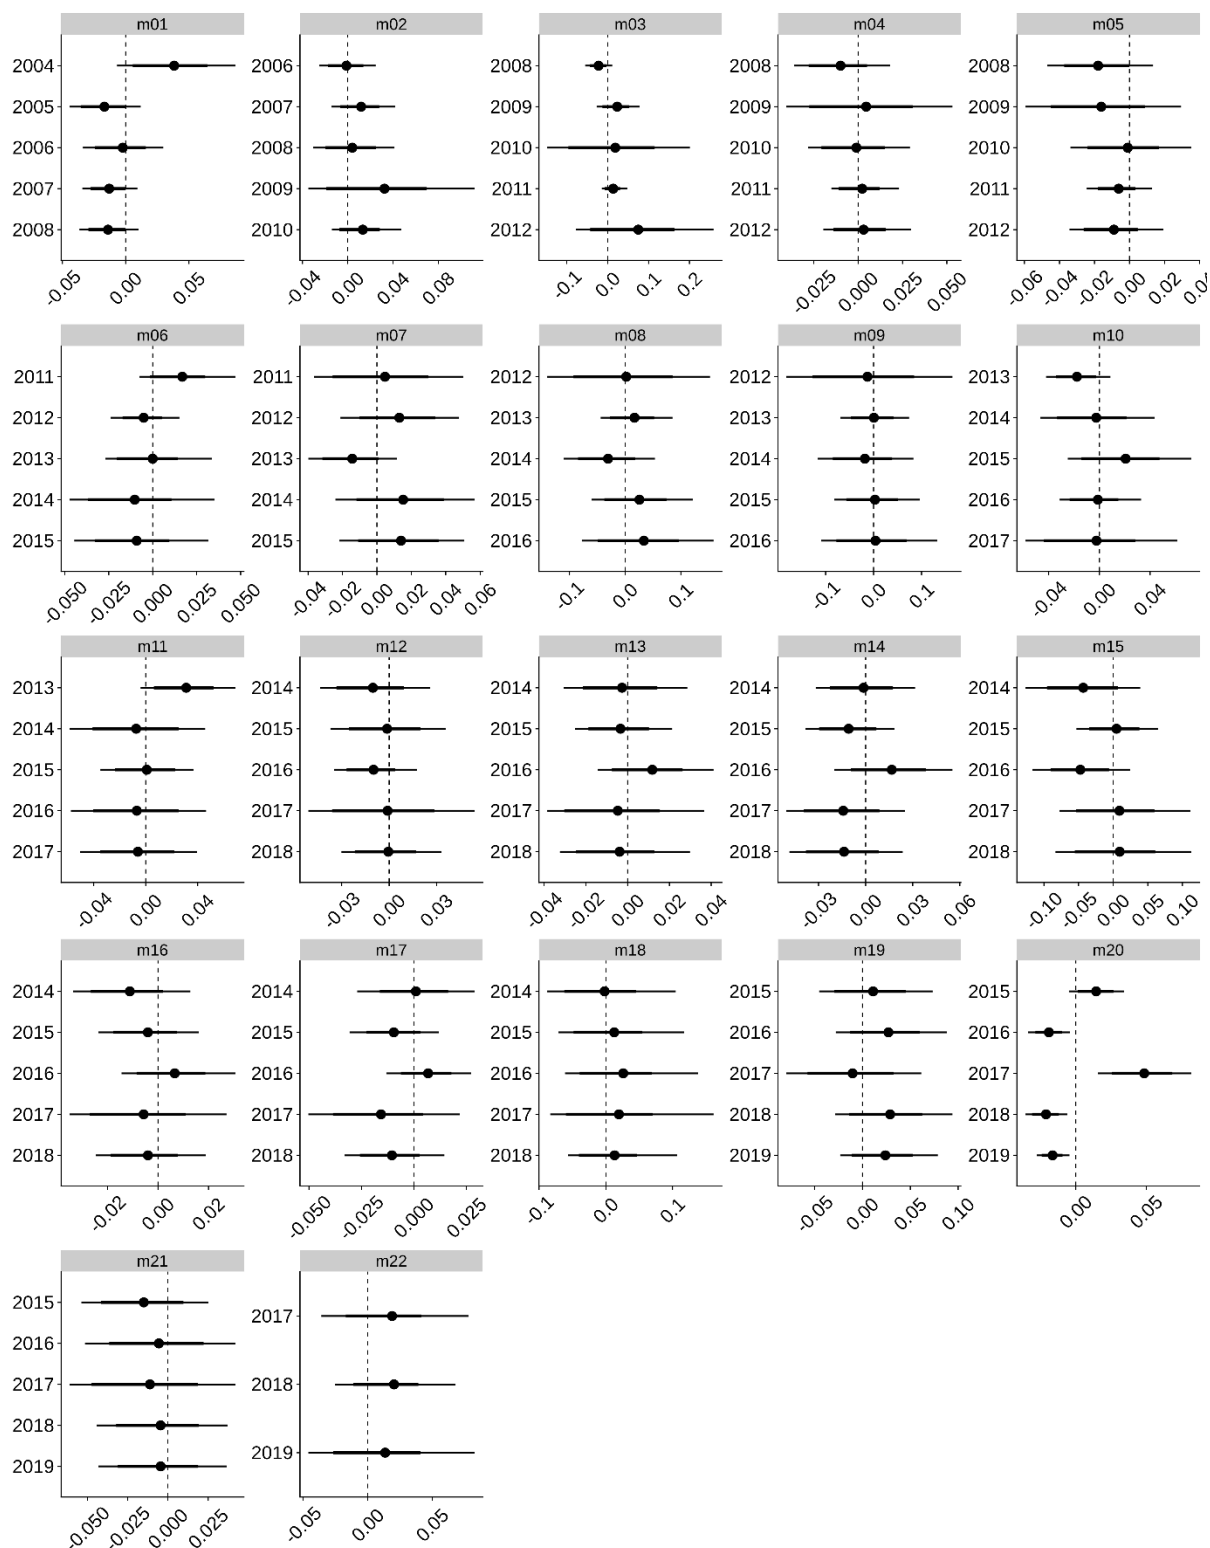

**Figure S5:** Average treatment effect (difference between treatment and control groups) for each year. Values are differences in area of tree canopy lost in hectares. Estimates are for each year for 5 years after a mine is established. Estimates are from spatial-temporal models with a zero-inflated negative binomial error structure implemented in a Bayesian modelling framework using R-INLA. Points are estimates of the mean of the posterior distribution, thick lines are the 80% credible intervals (calculated as the highest posterior density), and thin lines are the 95% credible intervals.



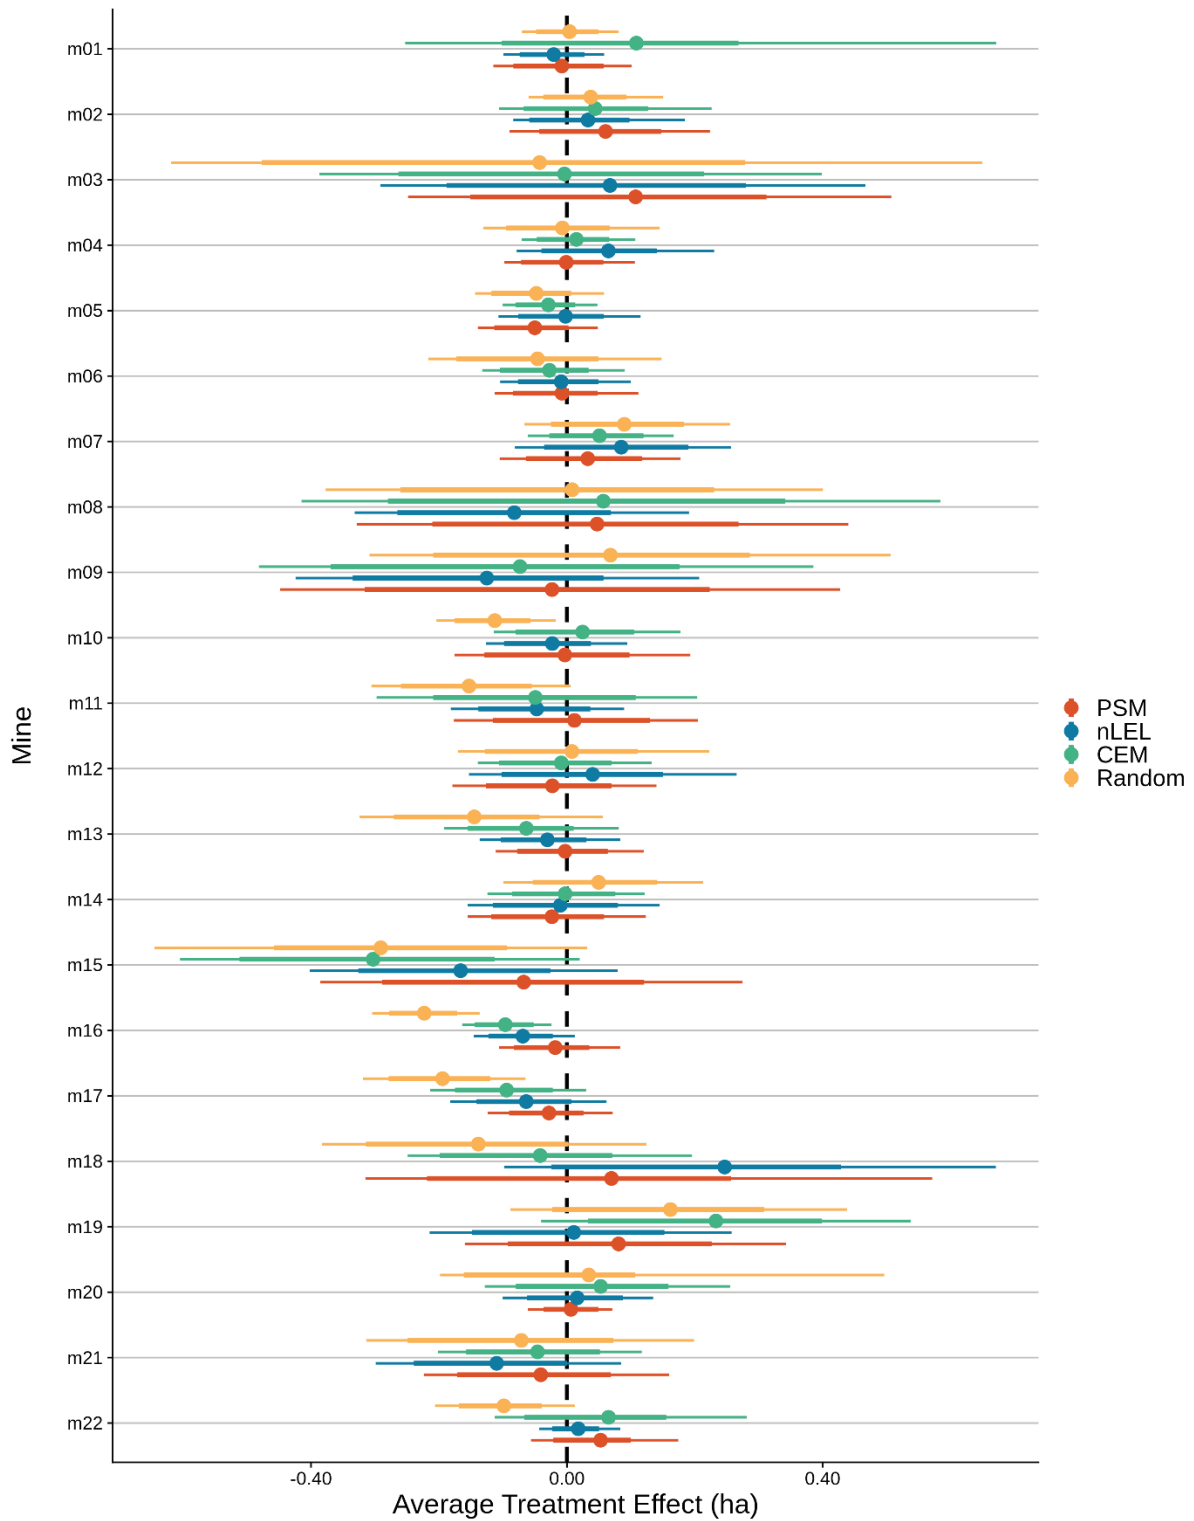

**Figure S6:** Aggregate five-year average treatment effect for each mine comparing different matching methods. PSM is Propensity Score Matching and is the dataset reported as the main result. CEM is Coarsened exact Matching, nLEL is the same as PSM but controls are drawn from both within and outwith Large-scale Exploration Leases, Random is a dataset with a random draw of controls equal to the number of treated cells. Estimates are from spatial-temporal models with a zero-inflated negative binomial error structure implemented in a Bayesian modelling framework using R-INLA. Points are estimates of the mean of the posterior distribution, thick lines are the 80% credible intervals, calculated as the highest posterior density, and thin lines are the 95% credible intervals.

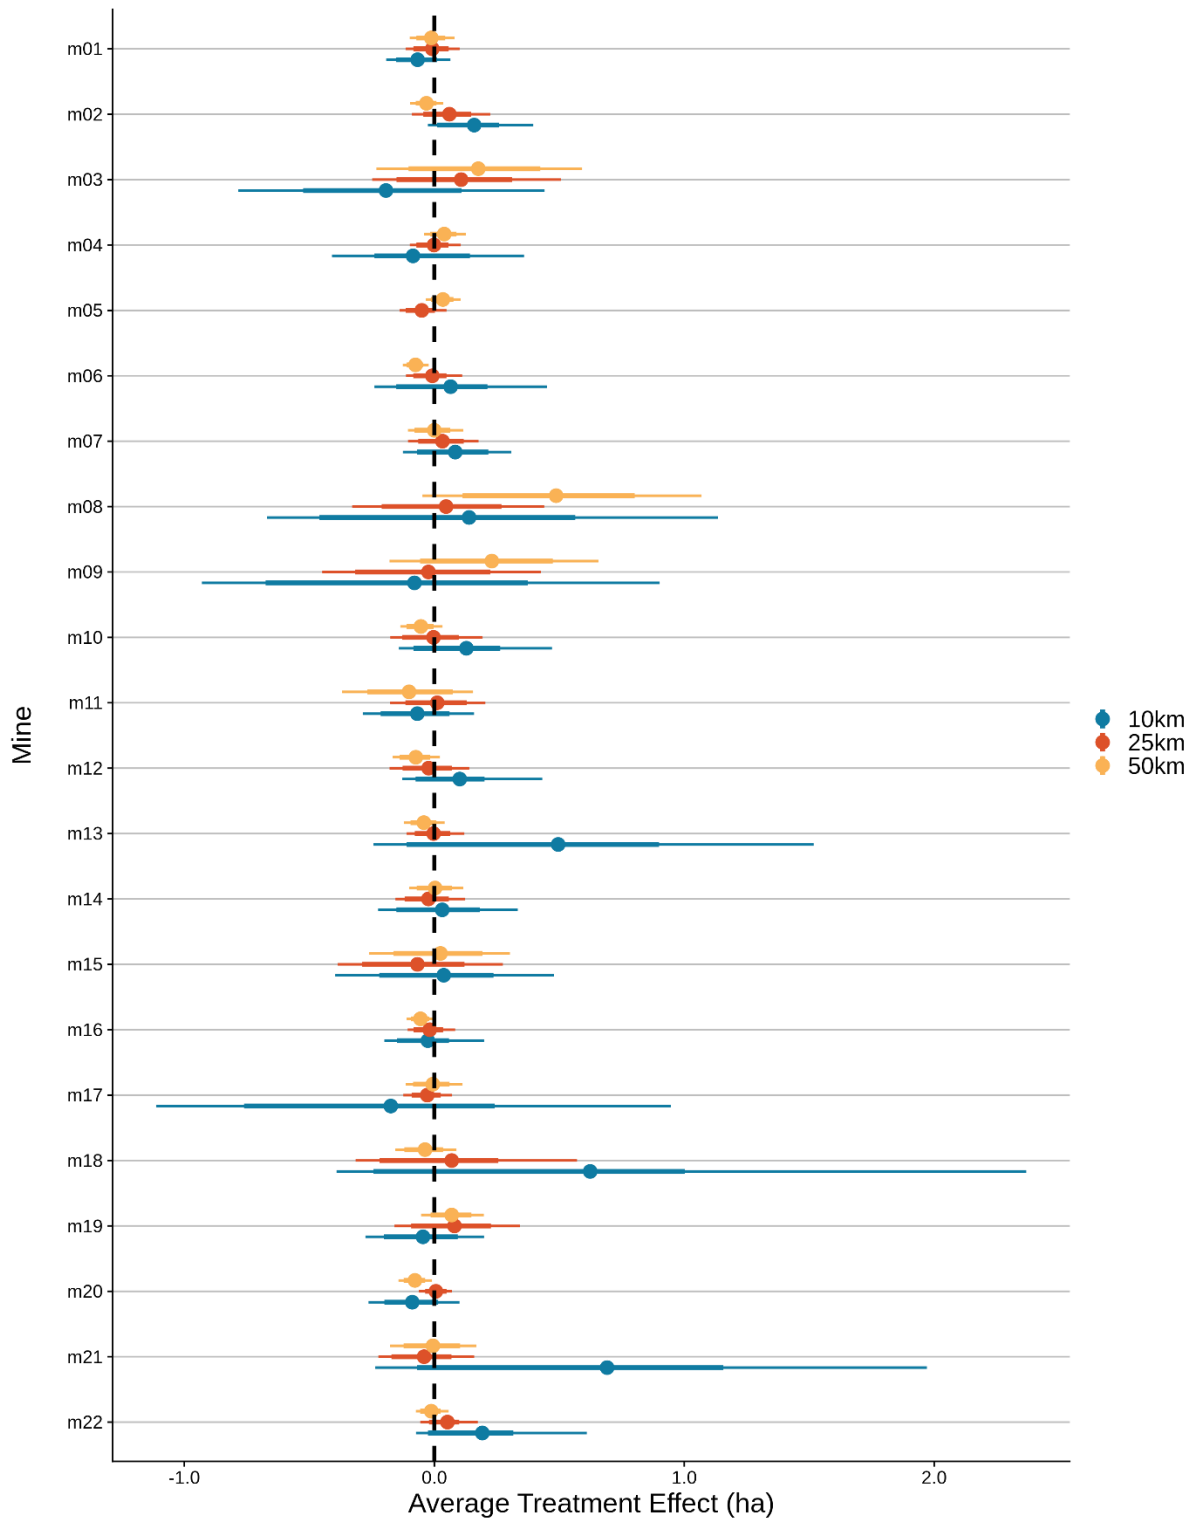

**Figure S7:** Aggerate five-year average treatment effect for each mine comparing different buffer distances. Dataset reported in main results is 25 km. Model for Mine 5 in the 10 km buffer dataset did not converge. Estimates are from spatial-temporal models with a zero-inflated negative binomial error structure implemented in a Bayesian modelling framework using R-INLA. Points are estimates of the mean of the posterior distribution, thick lines are the 80% credible intervals, calculated as the highest posterior density, and thin lines are the 95% credible intervals.

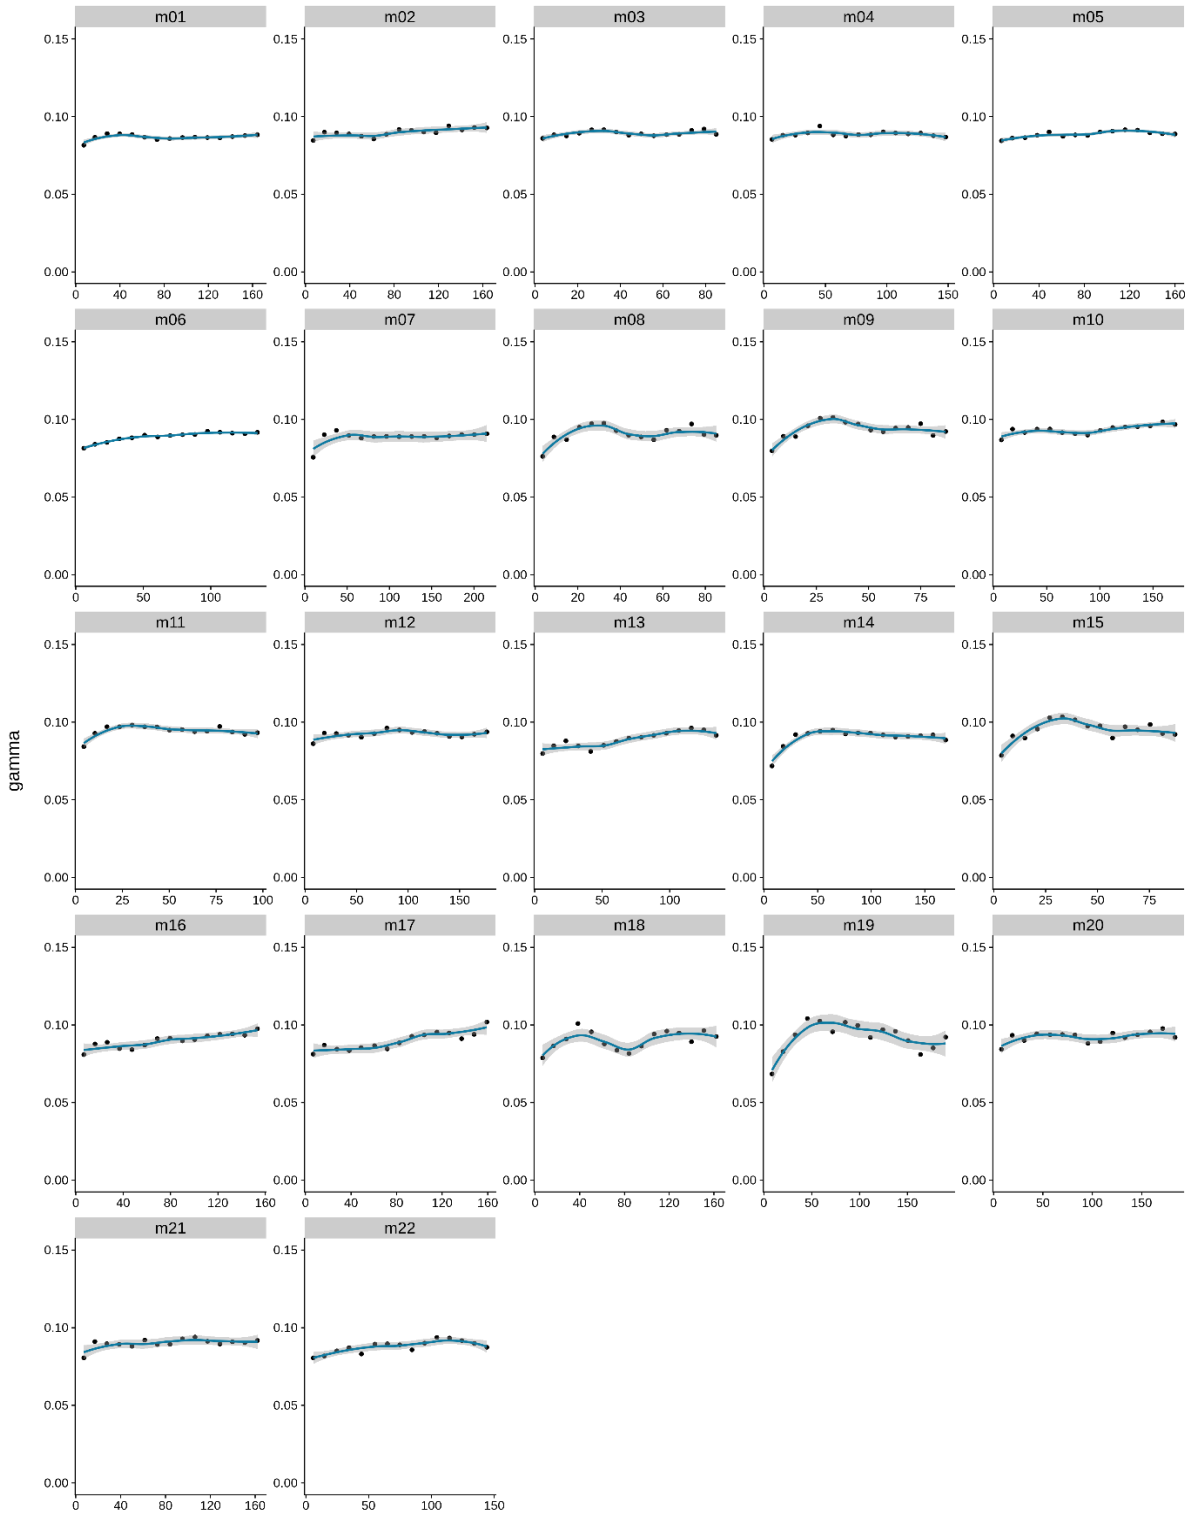

**Figure S8:** Variograms of simulated scaled quantile residuals estimated with the DHARMA package for each model. Plots show the change in variance for groups of points at increasing distances from each other. If there is no spatial dependency in the residuals, then the variance should not increase with distance and the lines should be approximately flat. This is not the case for some mines. However, as the datasets were sub-sampled to remove direct neighbours (i.e., no pixels are within 1.5 km of each other) and the presence of spatial autocorrelation tends to reduce standard errors and inflate effect sizes the residual spatial dependency are unlikely to be strongly influencing the interpretation of the results, i.e., that there is no evidence of a positive treatment effect.

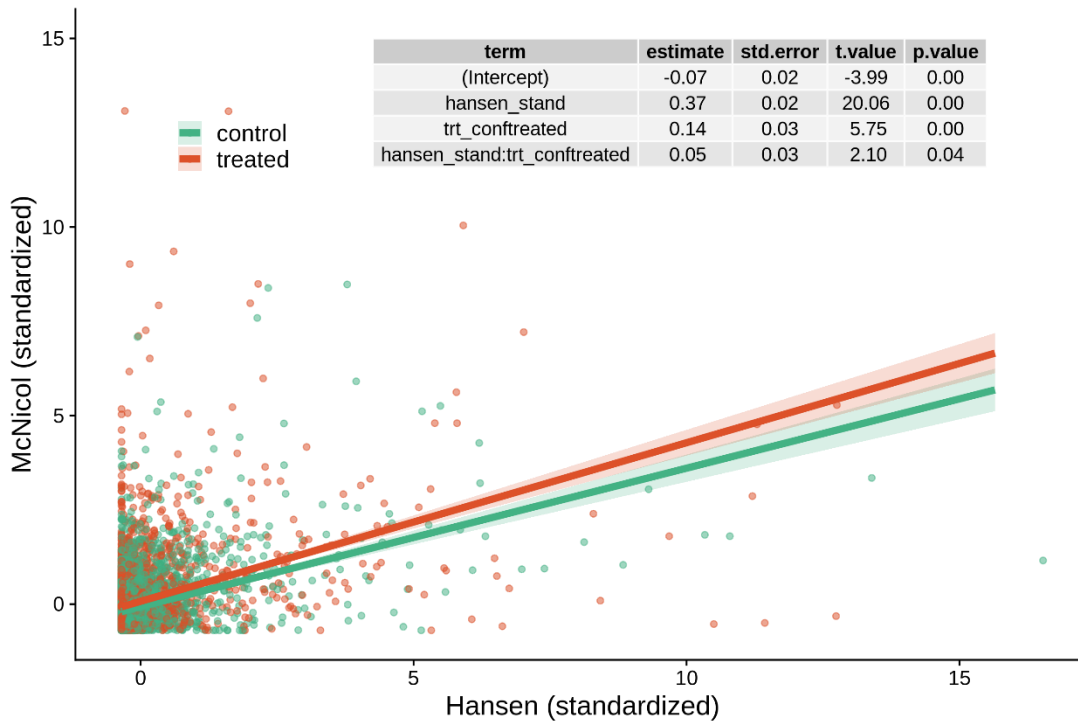

**Figure S9:** Data and predictions from a linear model where our Hansen-based response predicts deforestation estimated from radar remote sensing. The model was fit in a frequentist framework with an interaction between treatment status and the Hansen-based response. The inset table shows the estimates of model coefficients effects and lines are the slopes for treated and control units with confidence intervals. The points are the data used in the model. There is a very small difference between treated and control pixels with the Hansen response in treated pixels being slightly better at predicting the radar-based response.

Mine 1

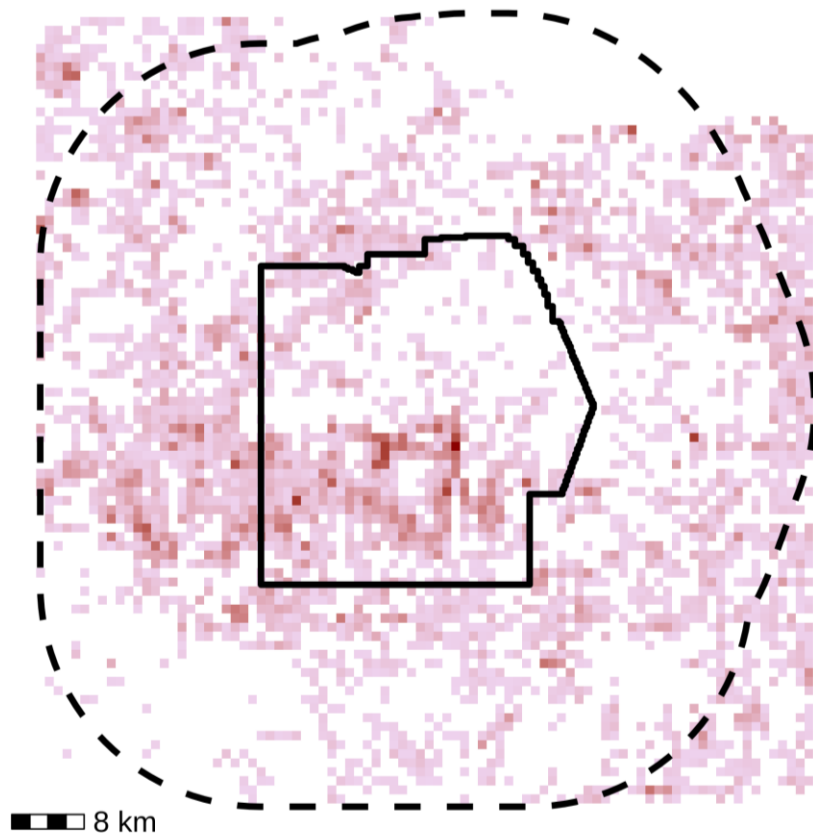

Mine 7

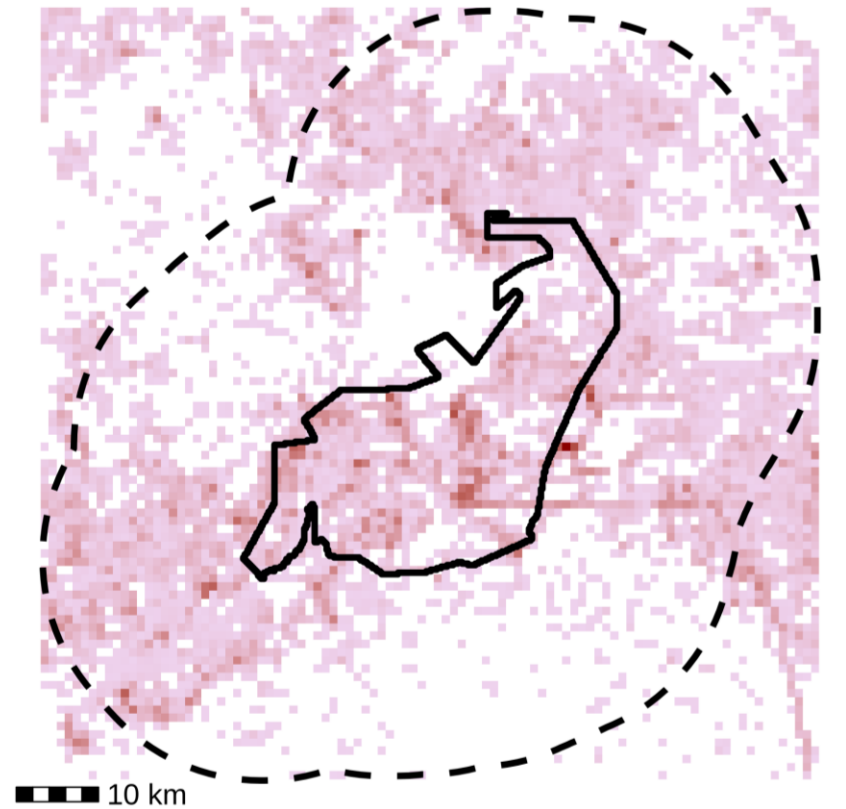

Figure S10: Example mines (mine 1 left and mine 7 right) showing the total deforestation in the period 5 years after mine establishment measure. Value is hectares of tree canopy area lost within each 1 km pixel. Both the largescale mining lease (solid black line, and 25 km buffer (dashed line) are shown. Values are calculated from Hansen dataset (see Methods), raw data can be seen at global forest watch website <https://www.globalforestwatch.org/map/>)

**Table S3:** Dataset size for each mine before and after each matching is applied. These are the values for 25% subsampled dataset. PSM Match is Propensity Score Matching, the dataset reported as the main results. CEM is coarsened exact matching a different matching method. nLEL is the same as PSM but controls come from both within and outwith Large-Scale Exploration leases. These values are for a single year, deforestation was analysed for five years (three for mine 22) so  $n$  for statistical models are these values multiplied by the number of years.

| Mine | Unmatched data |              |               | PSM match |          | CEM match |          | nLEL PSM match |          |
|------|----------------|--------------|---------------|-----------|----------|-----------|----------|----------------|----------|
|      | Treated        | LEL controls | nLEL controls | Treated   | Controls | Treated   | Controls | Treated        | Controls |
| m01  | 1,583          | 15,979       | 26,582        | 1,583     | 1,583    | 1,565     | 6,024    | 1,583          | 1,583    |
| m02  | 751            | 1,835        | 10,646        | 464       | 464      | 315       | 407      | 748            | 748      |
| m03  | 279            | 3,345        | 6,752         | 235       | 235      | 232       | 451      | 275            | 275      |
| m04  | 305            | 9,460        | 21,074        | 255       | 255      | 223       | 1,746    | 263            | 263      |
| m05  | 318            | 9,460        | 21,074        | 254       | 254      | 230       | 1,825    | 271            | 271      |
| m06  | 347            | 9,460        | 21,074        | 316       | 316      | 286       | 2,358    | 325            | 325      |
| m07  | 1,654          | 15,979       | 26,582        | 1,653     | 1,653    | 1,625     | 8,840    | 1,652          | 1,652    |
| m08  | 237            | 3,345        | 6,752         | 190       | 190      | 195       | 515      | 230            | 230      |
| m09  | 220            | 3,345        | 6,752         | 199       | 199      | 180       | 479      | 211            | 211      |
| m10  | 570            | 9,460        | 21,074        | 485       | 485      | 399       | 2,386    | 516            | 516      |
| m11  | 811            | 3,345        | 6,752         | 671       | 671      | 664       | 1,361    | 787            | 787      |
| m12  | 510            | 9,460        | 21,074        | 455       | 455      | 345       | 2,412    | 473            | 473      |
| m13  | 392            | 9,460        | 21,074        | 350       | 350      | 304       | 1,448    | 372            | 372      |
| m14  | 914            | 15,979       | 26,582        | 914       | 914      | 896       | 4,687    | 914            | 914      |
| m15  | 243            | 3,345        | 6,752         | 213       | 213      | 193       | 436      | 233            | 233      |
| m16  | 570            | 9,460        | 21,074        | 511       | 511      | 446       | 1,640    | 557            | 557      |
| m17  | 350            | 9,460        | 21,074        | 266       | 266      | 255       | 1,557    | 288            | 288      |
| m18  | 220            | 9,460        | 21,074        | 180       | 180      | 136       | 1,174    | 191            | 191      |
| m19  | 629            | 9,460        | 21,074        | 595       | 595      | 493       | 989      | 621            | 621      |
| m20  | 359            | 9,460        | 21,074        | 315       | 315      | 245       | 2,054    | 326            | 326      |
| m21  | 514            | 15,979       | 26,582        | 514       | 514      | 509       | 4,086    | 514            | 514      |
| m22  | 309            | 9,460        | 21,074        | 234       | 234      | 229       | 980      | 292            | 292      |

**Table S4:** Confounders and other data used in analysis and their source

| Variable                 | Range                  | Details                                                                                                                                                                                                                                                                                | Link to source                                                                                                                                                                                                                                                                                                                                                                     |
|--------------------------|------------------------|----------------------------------------------------------------------------------------------------------------------------------------------------------------------------------------------------------------------------------------------------------------------------------------|------------------------------------------------------------------------------------------------------------------------------------------------------------------------------------------------------------------------------------------------------------------------------------------------------------------------------------------------------------------------------------|
| Mining leases            |                        | Large scale Mining Leases. Accessed February 2020                                                                                                                                                                                                                                      | <a href="https://portals.landfolio.com/zambia">https://portals.landfolio.com/zambia</a>                                                                                                                                                                                                                                                                                            |
| Tree cover               | Each year 2001-2020    | Percentage tree canopy cover in 1 km <sup>2</sup> pixel for the previous year. Estimated from Hansen Global Forest Change v1.7 dataset.<br><br>Non-forest areas masked. Yearly value calculated by removing deforested pixels. Previous year used to be cover before mine established. | <a href="http://earthenginepartners.appspot.com/science-2013-global-forest">earthenginepartners.appspot.com/science-2013-global-forest</a>                                                                                                                                                                                                                                         |
| Deforestation            | Each year 2001-2019    | Area of tree canopy cover in a 1km <sup>2</sup> pixel lost each year in m <sup>2</sup> . Non-forest pixels, defined as areas with <10% canopy cover at 0.5 ha resolution, removed - this definition comes from Zambia's national definition.                                           | As above                                                                                                                                                                                                                                                                                                                                                                           |
| Pre-treatment outcome    | Each year 2002-2020    | Binary presence or not of any deforestation in previous two years.                                                                                                                                                                                                                     | As above                                                                                                                                                                                                                                                                                                                                                                           |
| Distance to nearest road | 2000-2009<br>2010-2020 | Distance to nearest 1 km <sup>2</sup> pixel containing a road. Roads are taken from two datasets as to ensure value is from before treatment date. Values are constant within the two time periods.                                                                                    | Pre-2010 roads are from:<br><a href="https://gis-lab.info/qa/vmap0-eng.html">https://gis-lab.info/qa/vmap0-eng.html</a><br><br>2010 onwards from:<br><a href="https://sedac.ciesin.columbia.edu/data/set/groads-global-roads-open-access-v1/maps?facets=region:africa">https://sedac.ciesin.columbia.edu/data/set/groads-global-roads-open-access-v1/maps?facets=region:africa</a> |
| Elevation and slope      | Constant               | The weighted mean elevation and slope within a 1km <sup>2</sup> pixel estimated from the SRTM Digital Elevation Data Version 4 dataset using inbuilt functions from Google Earth Engine. Slope was estimate at original resolution (90 by 90 m).                                       | <a href="https://srtm.csi.cgiar.org">https://srtm.csi.cgiar.org</a>                                                                                                                                                                                                                                                                                                                |
| Population               | Each year 2000-2020    | Population density in a 1 km <sup>2</sup> pixel Worldpop yearly population datasets adjusted for UN country totals                                                                                                                                                                     | <a href="https://www.worldpop.org/doi/10.5258/SOTON/WP00675">https://www.worldpop.org/doi/10.5258/SOTON/WP00675</a>                                                                                                                                                                                                                                                                |

|                     |                     |                                                                                                                                                                                  |                                                                                                                                                                               |
|---------------------|---------------------|----------------------------------------------------------------------------------------------------------------------------------------------------------------------------------|-------------------------------------------------------------------------------------------------------------------------------------------------------------------------------|
|                     |                     |                                                                                                                                                                                  |                                                                                                                                                                               |
| Previous burning    | Each year 2002-2020 | Number of months there was burning within a pixel in the previous two years. Estimated from MCD64A1.006 MODIS Burned Area Monthly Global.                                        | <a href="https://lpdaac.usgs.gov/products/mcd64a1v006">https://lpdaac.usgs.gov/products/mcd64a1v006</a>                                                                       |
| Protected area      | Constant            | A binary value whether a pixel is within a National Park, Game Management Area or Forest Reserve. Data taken from the World Database on Protected Areas, accessed February 2020. | <a href="https://www.protectedplanet.net/en">https://www.protectedplanet.net/en</a>                                                                                           |
| Agroecological zone | Constant            | Which agroecological zone a pixel is in taken from CELL5M: A Multidisciplinary Geospatial Database for Africa South of the Sahara.                                               | <a href="https://dataverse.harvard.edu/dataset.xhtml?persistentId=doi:10.7910/DVN/G4TBLF">https://dataverse.harvard.edu/dataset.xhtml?persistentId=doi:10.7910/DVN/G4TBLF</a> |
| Zambian provinces   | Constant            | Country and province outlines from GADM database v3.4                                                                                                                            | <a href="https://gadm.org/data.html">https://gadm.org/data.html</a>                                                                                                           |
